# Supplementary material for: Soil moisture and atmospheric dryness govern regional controls of land–atmosphere water and heat fluxes on the Tibetan Plateau
Source: Research Square preprint supplement (doi:10.21203/rs.3.rs-8770438/v1), 2026-02-06
Supplement: Supplementary file 1 [file 285eefc53ef8ebbdf888393d.docx]

Supplementary Text

**Surface conductance**

When VPD increases, plants usually limit excessive water loss by partially closing stomata. We used the following empirical equation to describe the response of surface conductance (Gs) to changes in VPD (Oren et al., 1999):

(1)

In this study, represents the actual surface conductance, which denotes the canopy-scale weighted average of stomatal conductance at the single-leaf level, calculated based on the Penman–Monteith equation, following the method of Novick et al. (2016). It should be noted that, since the calculation involves friction velocity (u*), and some of the site-level data downloaded for this study did not include this variable, not all sites were incorporated into the analysis. When examining the relationship between VPD and Shallow VWC, we selected sites with complete friction velocity data for analysis, specifically including sites 1, 3, 4–5, 10, and 12–18. In addition, the Shallow VWC at the Ali site was significantly higher than that at other arid sites. The results presented in Section 3.2 indicate that the main driving factors at the Ali site differ significantly from those at other arid sites; therefore, this site was excluded from the analysis of arid regions. is the reference conductance when VPD = 1 kPa, and denotes the sensitivity of to , with larger values indicating a stronger response of to VPD. To quantify the relationship between and VPD, we used high-frequency half-hourly observational data. During data screening, in addition to retaining only samples with quality control flags of 0 or 1, we further excluded observations under the following conditions: Rain ≠ 0, downward shortwave radiation < 50 W m⁻², and WS < 0.5 m s⁻¹. In addition, to avoid potential uncertainties in estimating under low-VPD conditions, we used only observations with VPD ≥ 0.95 kPa for fitting when calculating and . The rationale is that when VPD approaches zero, the method of inferring by dividing LE by VPD becomes unreliable. Moreover, under low-VPD conditions, boundary layer conductance may become the primary limiting factor for ET observations. These issues further exacerbate the uncertainty under low-VPD conditions (Novick et al., 2016). was calculated as the mean of the actual derived from observations with 0.95 < VPD < 1.05 kPa. Although VPD and soil moisture are significantly coupled at seasonal to annual scales, their correlation is markedly reduced at the hourly scale. Therefore, this study used half-hourly resolution observational data to analyze the relationships between surface conductance, VPD, and Shallow VWC (Novick et al., 2016).

**(a)**


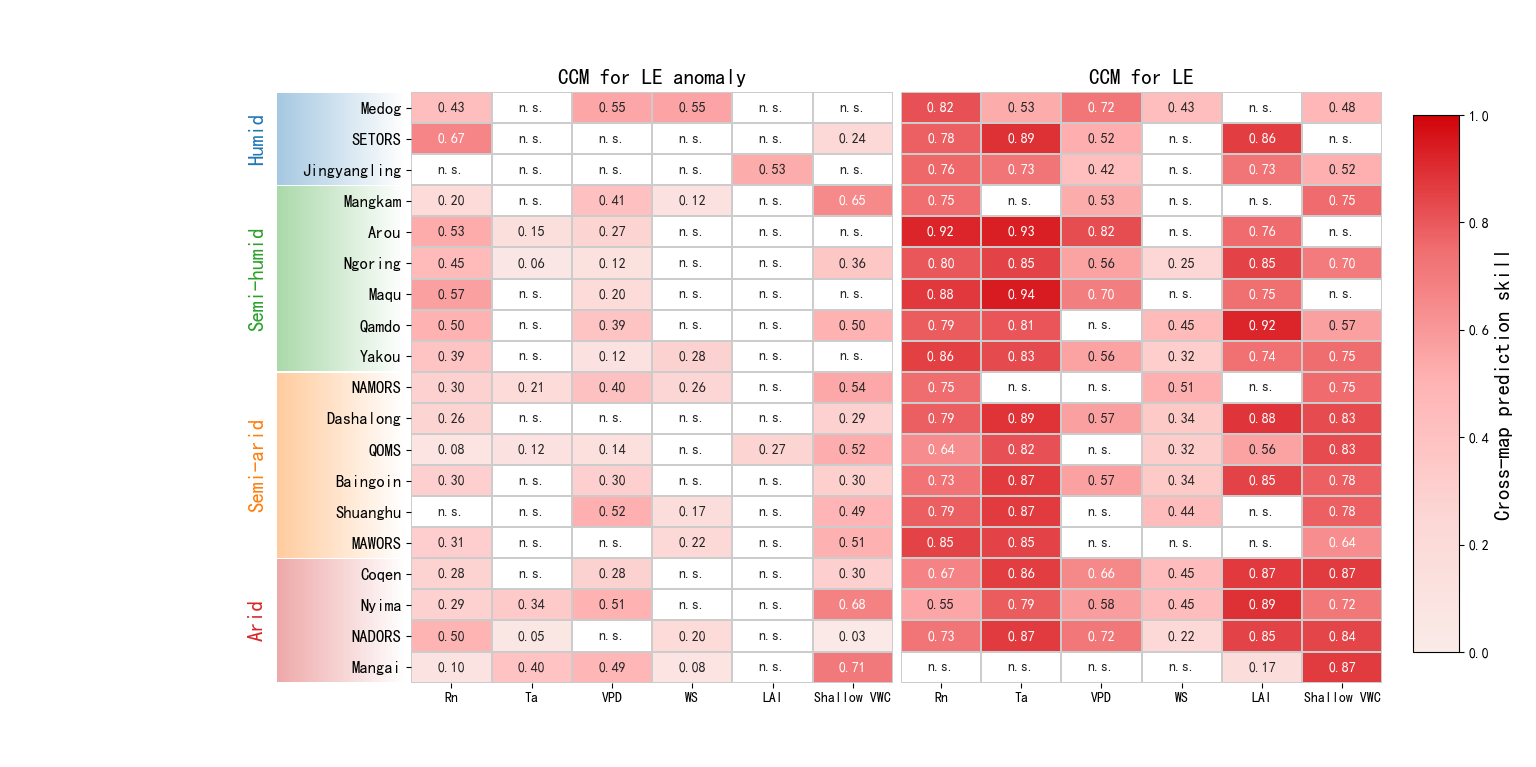


**(b)**


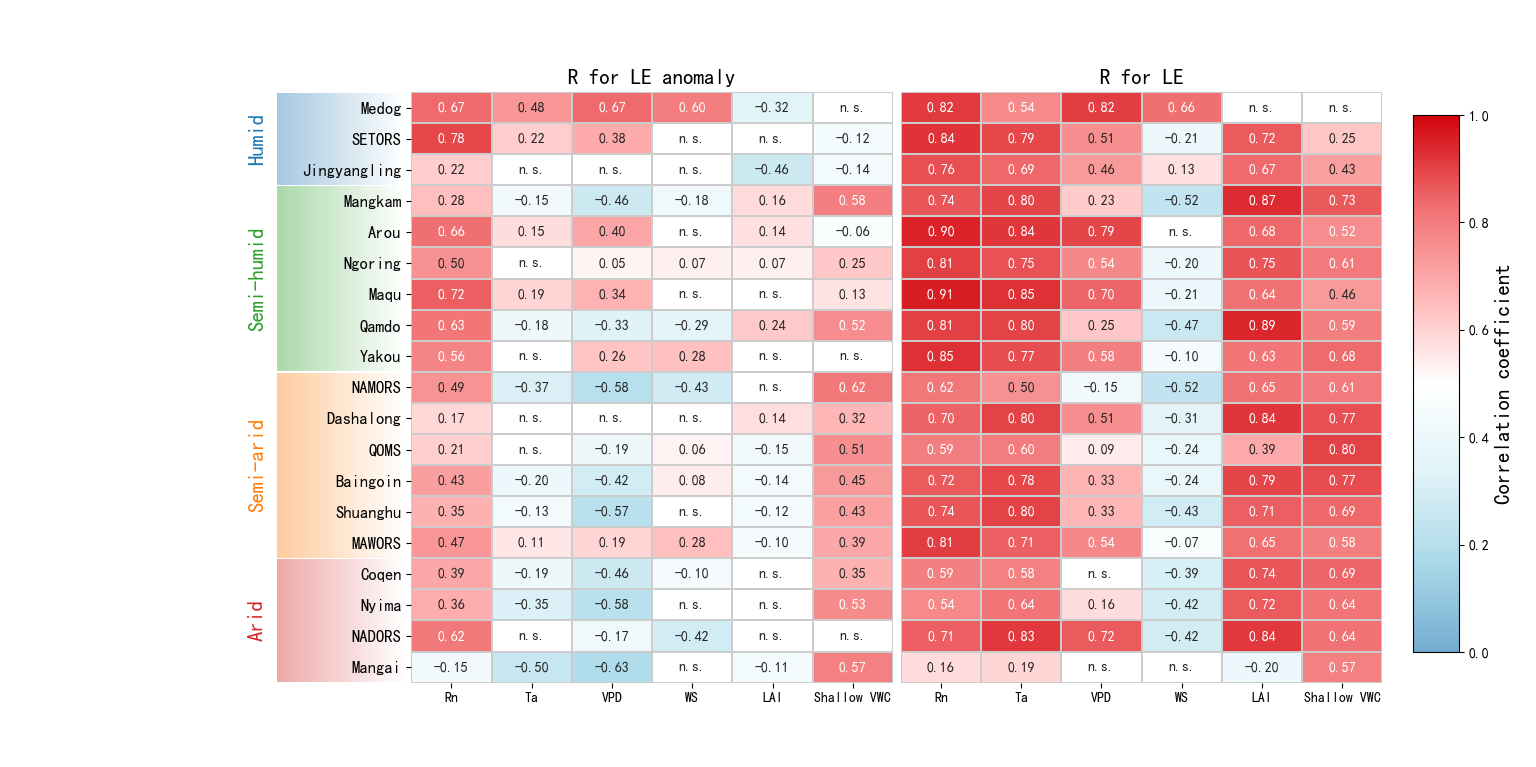


Fig. S1. Results of CCM and correlation analyses between daily LE and environmental drivers.a, b show the (a) CCM results and (b) correlation analyses between LE and its anomalies (i.e., LE with the seasonal effect removed) and various environmental drivers. Each row represents one flux tower site. The font color of site names distinguishes their climate type: blue indicates humid sites, green indicates semi-humid sites, yellow indicates semi-arid sites, and red indicates arid sites. Sites are ordered from top to bottom according to increasing aridity. ‘n.s.’ indicates that the CCM or correlation result is not statistically significant (α = 0.05).

**(a)**


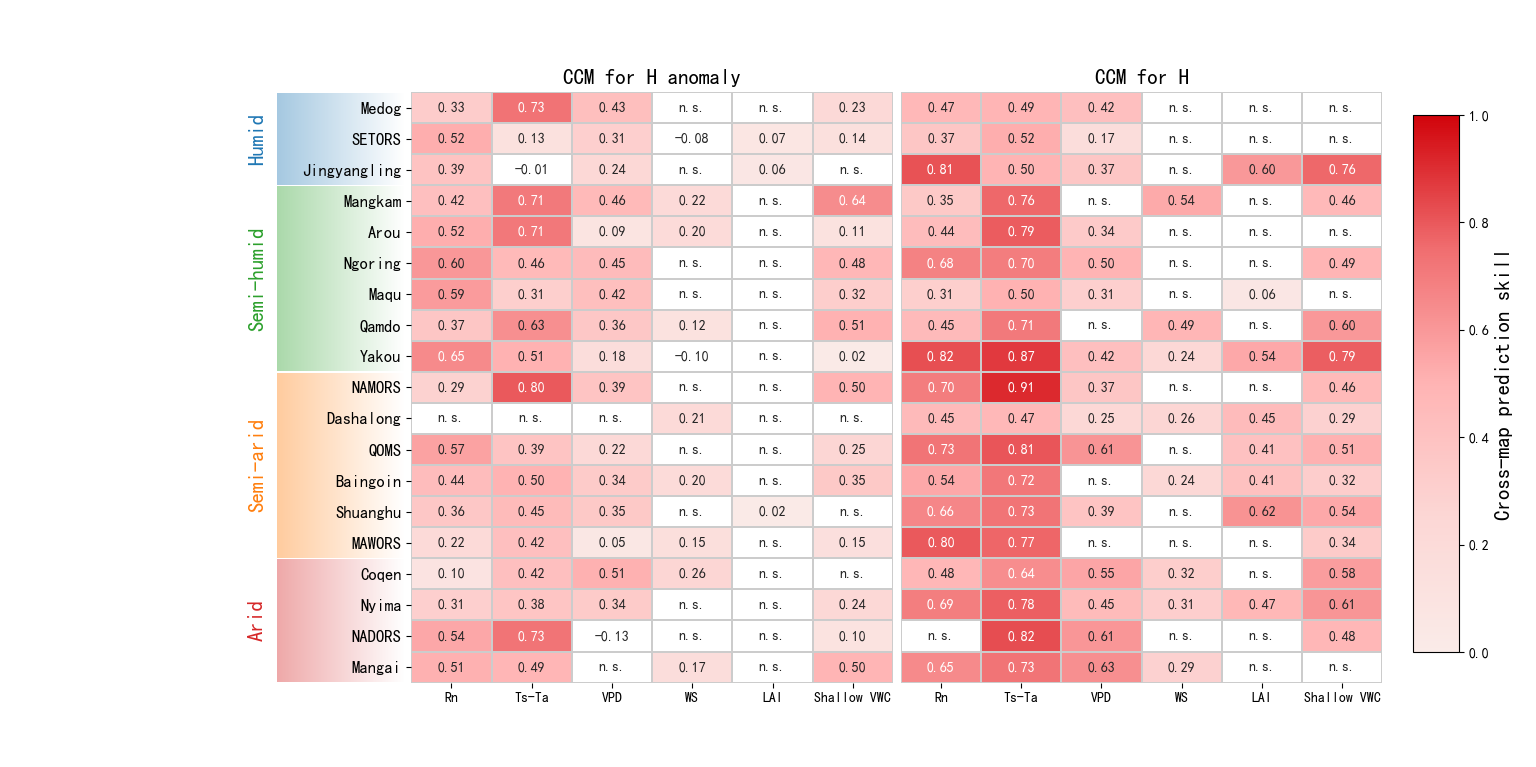


**(b)**


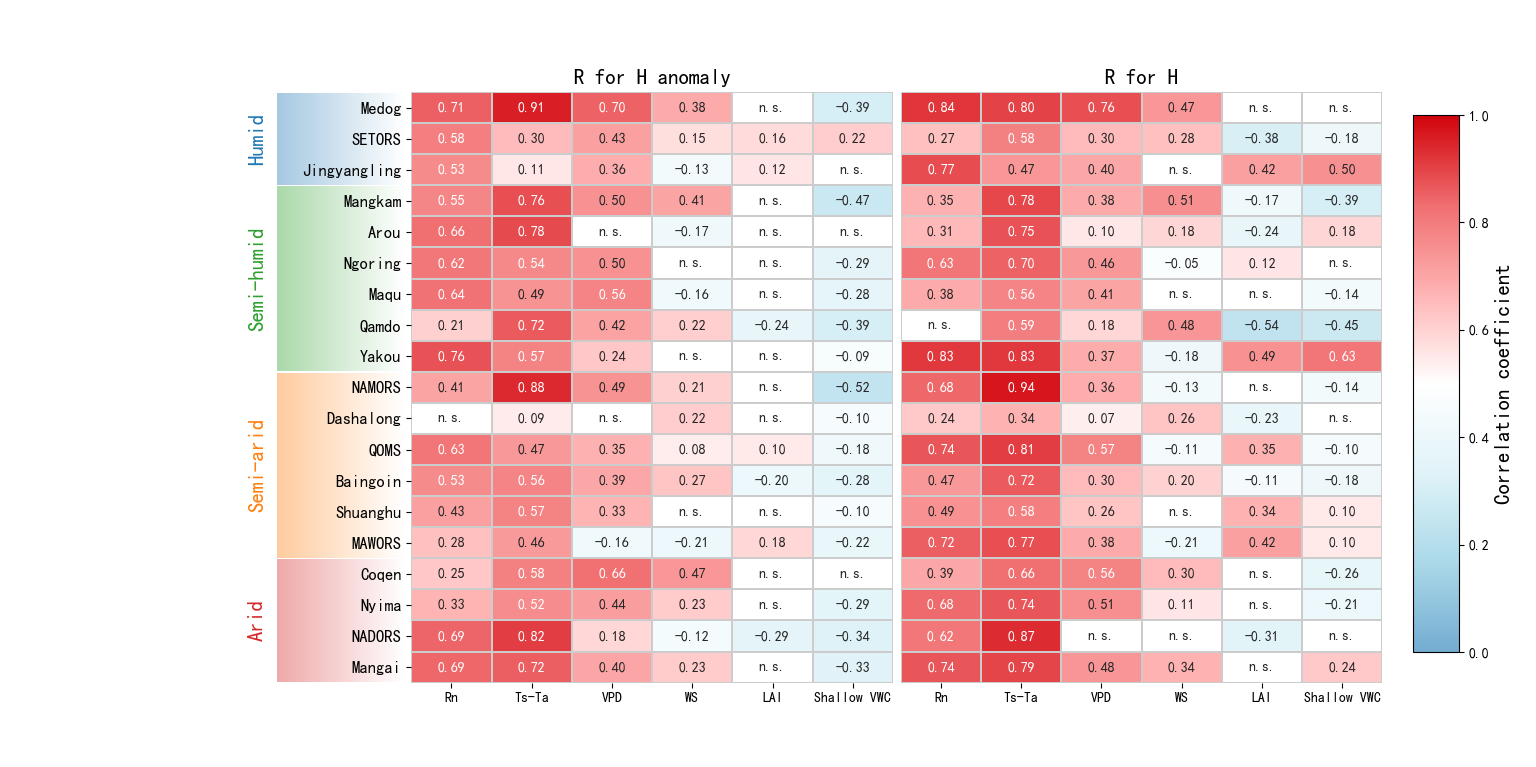


Fig. S2. Results of CCM and correlation analyses between daily H and environmental drivers.a, b show the (a) CCM results and (b) correlation analyses between H and its anomalies (i.e., H with the seasonal effect removed) and various environmental drivers. Each row represents one flux tower site. The font color of site names distinguishes their climate type: blue indicates humid sites, green indicates semi-humid sites, yellow indicates semi-arid sites, and red indicates arid sites. Sites are ordered from top to bottom according to increasing aridity. ‘n.s.’ indicates that the CCM or correlation result is not statistically significant (α = 0.05).

**(a)**


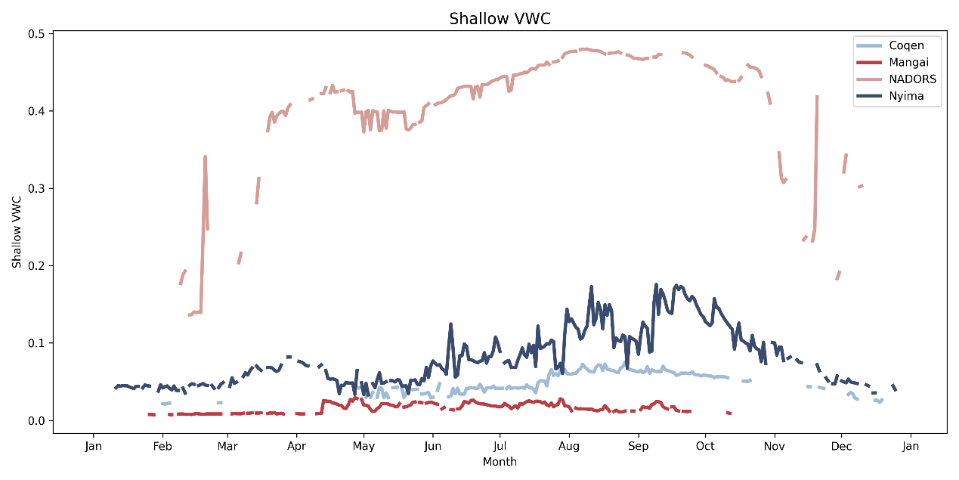


**(b)**


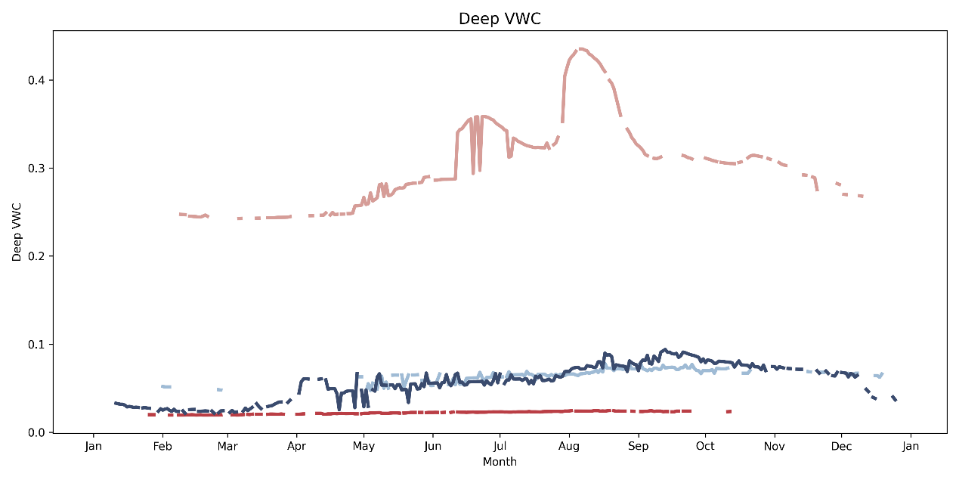


**(c)**


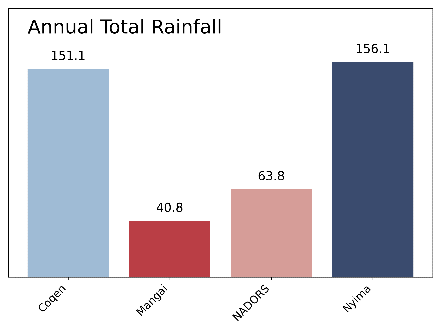

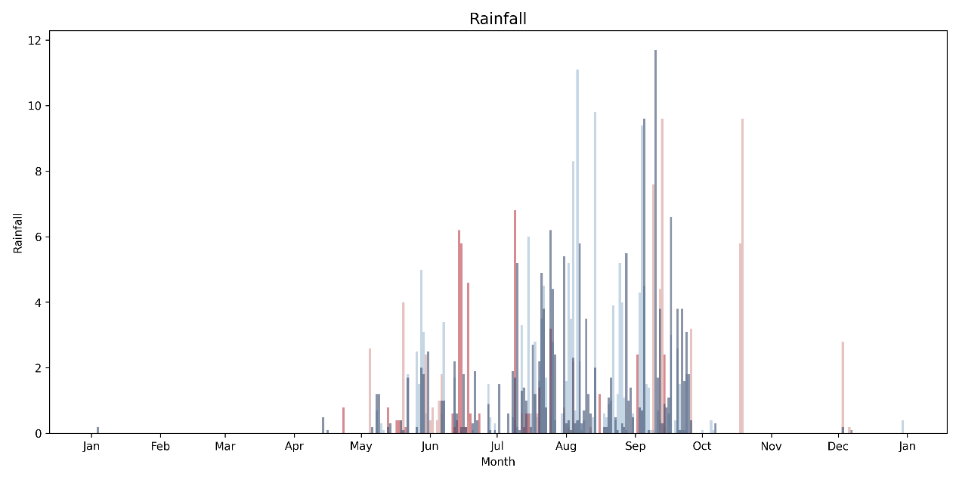


Fig. S3. Seasonal variations of Shallow VWC, Deep VWC, and Rainfall at drought sites (daily mean values during 2021–2023). (a) Shallow VWC (mean at 0–10 cm), (b) Deep VWC (mean soil moisture at 40 cm and deeper), and (c) Rainfall. The legend shows the corresponding annual mean rainfall at each site.


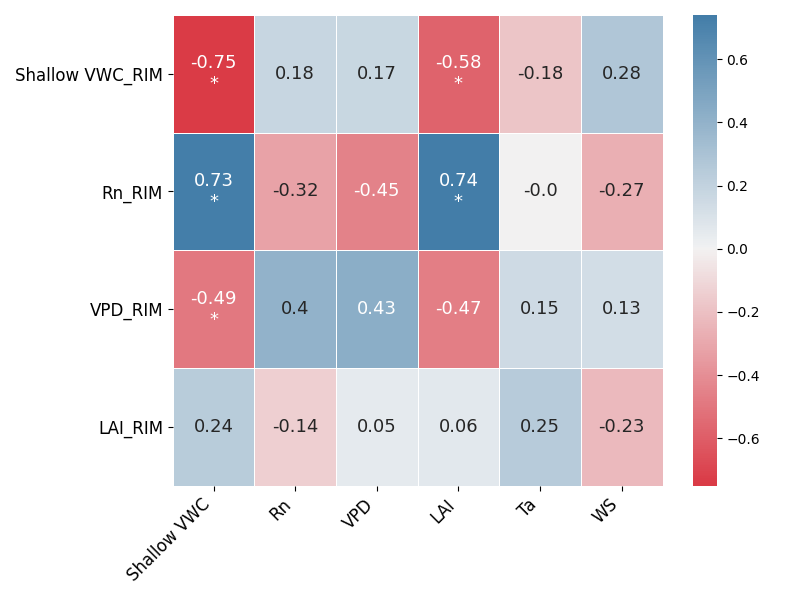


**Fig. S4**. Correlation between the RIM of the main drivers of LE at each site and the multi-year means of environmental factors. Asterisks indicate that the correlation coefficients pass the significance test (α = 0.05).

**
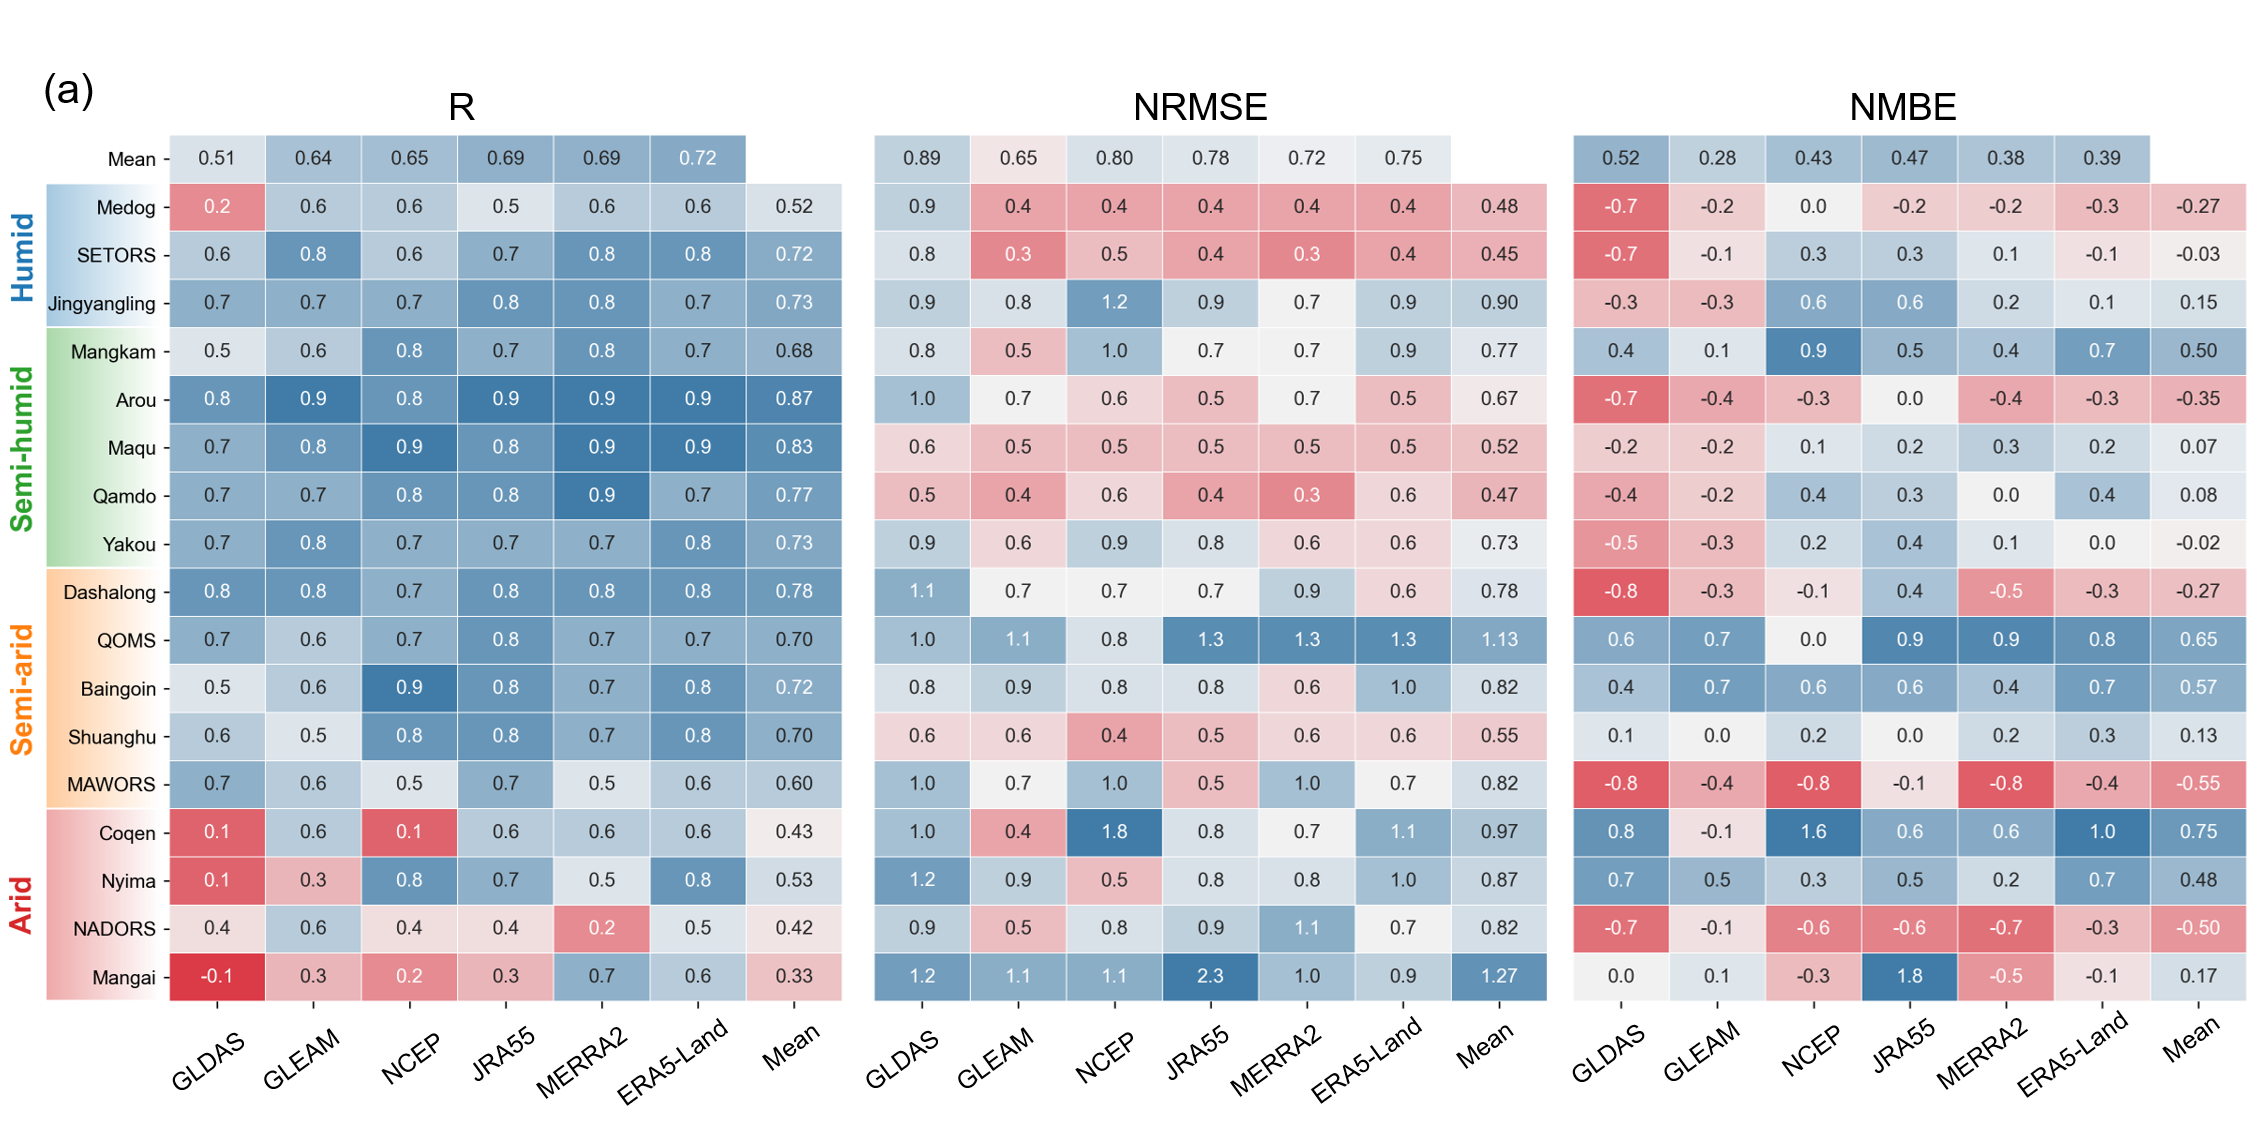
**

**
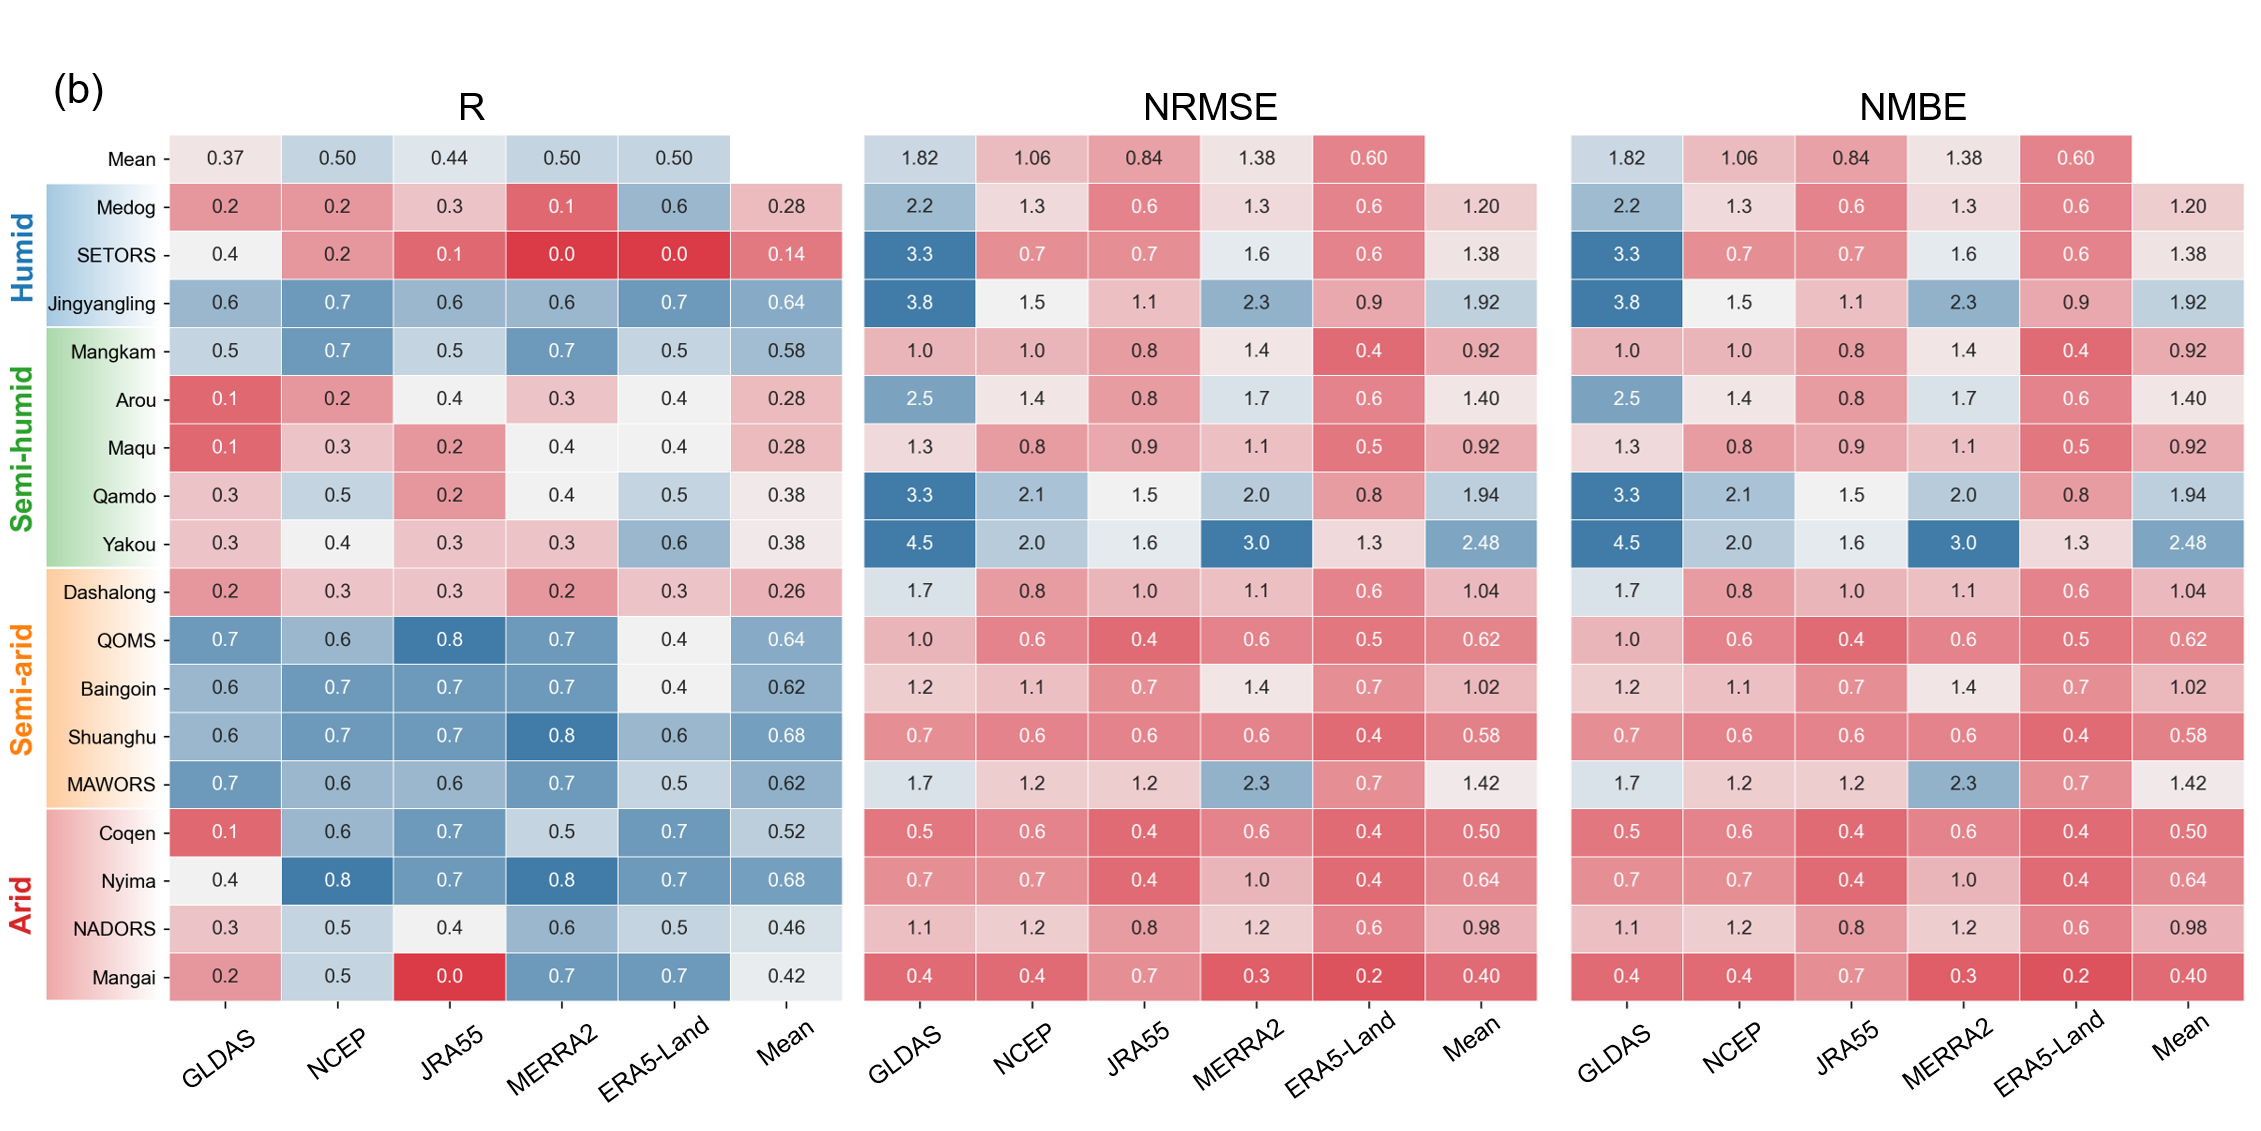
**

**Fig. S5**. Comparison between various surface water flux products and flux observations.

(a) LE results, (b) H results. The values in each cell represent the R, NRMSE, and NMBE of the corresponding product at the given site. The first row and the last column indicate, respectively, the average performance of each product across all sites (column average), and the average performance of all products at each site (row average). For NMBE, we first take its absolute value before calculating the average. Each row corresponds to a flux tower site, and the color band of the site name indicates its climate type.

Table S1. In Fig. 5(a), the absolute values of each scatter point are taken and averaged; bold values indicate the LE product that performs best under this absolute-value mean metric.

|  | Rn | LAI | VPD | Shallow VWC |
| --- | --- | --- | --- | --- |
| ERA5-Land | **0.098** | **0.119** | 0.212 | 0.161 |
| GLDAS | 0.179 | 0.188 | 0.412 | 0.273 |
| GLEAM | 0.100 | 0.121 | 0.198 | 0.243 |
| JRA55 | 0.150 | 0.123 | **0.176** | **0.149** |
| MERRA2 | 0.173 | 0.125 | 0.249 | 0.153 |
| NCEP | 0.148 | 0.164 | 0.215 | 0.154 |

Table S2. Basic information of the eddy-covariance (EC) stations used in this study for land-atmosphere water and heat flux measurements (climate zones were determined based on in situ data).

| No. | Sites | Latitude°N, longitude°E | Land cover type | Elevation (m) | Availability | Climate zone | Reference |
| --- | --- | --- | --- | --- | --- | --- | --- |
| 1 | Medog | 29.32°N, 95.29°E | Forest | 820 | 2021-2023 | Humid | (Ma et al., 2023) |
| 2 | Jingyangling | 37.83°N, 101.11°E | Alpine meadow | 3750 | 2018-2021 | Humid | (Ma et al., 2024) |
| 3 | SETORS | 29.77°N, 94.73°E | Alpine meadow | 3327 | 2021-2023 | Humid | (Ma et al., 2024) |
| 4 | Mangkam | 29.64°N, 98.59°E | Alpine meadow | 3840 | 2021-2024 | Semi-humid | (Ma et al., 2023) |
| 5 | Qamdo | 31.15°N, 97.17°E | Alpine steppe | 3307 | 2021-2024 | Semi-humid | (Ma et al., 2023) |
| 6 | Ngoring Lake | 34.91°N, 97.55°E | Alpine steppe | 4280 | 2012-2020 | Semi-humid | (Ma et al., 2024) |
| 7 | Yakou | 38.01°N, 100.24°E | Alpine meadow | 4148 | 2016-2019 | Semi-humid | (Ma et al., 2024) |
| 8 | Maqu | 33.88°N, 102.15°E | Alpine steppe | 3434 | 2014-2018 | Semi-humid | (Ma et al., 2024) |
| 9 | Arou | 38.04°N, 100.46°E | Alpine grassland | 3033 | 2014-2020 | Semi-humid | (Ma et al., 2024) |
| 10 | NAMORS | 30.77°N, 90.98°E | Alpine steppe | 4730 | 2021-2023 | Semi-arid | (Ma et al., 2024) |
| 11 | Dashalong | 38.83°N, 98.94°E | Alpine meadow | 3739 | 2014-2021 | Semi-arid | (Ma et al., 2024) |
| 12 | Baingoin | 31.4°N, 90.01°E | Bare ground | 4709 | 2021-2024 | Semi-arid | (Ma et al., 2023) |
| 13 | Shuanghu | 33.22°N, 88.83°E | Alpine steppe | 4947 | 2021-2023 | Semi-arid | (Ma et al., 2023) |
| 14 | QOMS | 28.36°N, 86.95°E | Alpine desert | 4276 | 2013-2023 | Semi-arid | (Ma et al., 2024) |
| 15 | MAWORS | 38.41°N, 75.05°E | Alpine meadow | 3647 | 2012-2017 | Semi-arid | (Ma et al., 2024) |
| 16 | Coqen | 31.04°N, 85.16°E | Alpine steppe | 4683 | 2021-2023 | Arid | (Ma et al., 2023) |
| 17 | Nyima | 31.79°N, 87.23°E | Alpine steppe | 4573 | 2021-2024 | Arid | (Ma et al., 2023) |
| 18 | NADORS | 33.39°N, 79.7°E | Alpine desert | 4270 | 2021-2023 | Arid | (Ma et al., 2024) |
| 19 | Mangai | 37.95°N, 91.27°E | Bare ground | 3073 | 2021-2023 | Arid | (Ma et al., 2023) |

**Table S3.** Data sources and descriptions of the products evaluated in this study.

| Name | Spatial resolution | temporal resolution | temporal coverage | Reference |
| --- | --- | --- | --- | --- |
| ERA5-Land | 0.1° x 0.1° | hourly | January 1950 –present | Muñoz-Sabater et al., 2021 |
| MERRA2 | 0.5 ° x 0.625 ° | hourly | January 1980 –present | (Gelaro et al., 2017, p. 2) |
| JRA55 | 1.25°×1.25° | 3 hourly | January 1958 – February 2024 | Kobayashi et al., 2015 |
| NCEP‐GDAS | 0.25°×0.25° | 6 hourly | July 2015 –present | (National Centers for Environmental Prediction, National Weather Service, NOAA, U.S. Department of Commerce, 2015) |
| GLEAM-4.2a | 0.1° x 0.1° | daily | January 1980 –December 2023 | Miralles et al., 2025 |
| GLDAS-CLSM | 0.25° x 0.25° | daily | February 2003 –present | Li et al., 2019 |

**Table S4.** Predictor variables at each site in this study and their corresponding variance inflation factor (VIF) values.

| Site | LAI | Rn_Avg | Shallow_VWC | Ta | VPD | WS |
| --- | --- | --- | --- | --- | --- | --- |
| Arou | 1.01 | 1.22 | 1.06 | 1.90 | 2.31 | 1.12 |
| BANG | 1.09 | 1.12 | 1.35 | 2.52 | 2.67 | 1.31 |
| CHDU | 1.16 | 1.18 | 1.53 | 2.59 | 3.10 | 1.22 |
| COQI | 1.03 | 1.19 | 1.12 | 2.48 | 2.61 | 1.08 |
| Dashalong | 1.11 | 1.18 | 1.19 | 1.63 | 1.98 | 1.05 |
| JILO | 1.05 | 1.23 | 1.11 | 2.03 | 2.45 | 1.34 |
| Jingyangling | 1.05 | 1.23 | 1.03 | 1.67 | 1.87 | 1.13 |
| MAKA | 1.06 | 1.29 | 1.71 | 1.98 | 3.15 | 1.08 |
| MANA | 1.06 | 1.59 | 1.35 | 4.10 | 5.21 | 1.05 |
| MAWORS | 1.02 | 1.07 | 1.08 | 2.18 | 2.31 | 1.42 |
| MOTO | 1.92 | 2.14 | 3.77 | 3.67 | 15.29 | 16.11 |
| Maqu | 1.01 | 1.40 | 1.13 | 1.67 | 2.16 | 1.11 |
| NADORS | 1.11 | 1.38 | 4.60 | 12.25 | 6.16 | 1.39 |
| NAMORS | 1.04 | 1.10 | 1.46 | 3.16 | 4.39 | 1.81 |
| NIMA | 1.03 | 1.14 | 1.24 | 3.03 | 2.78 | 1.25 |
| Ngoring | 1.02 | 1.23 | 1.35 | 1.44 | 1.93 | 1.01 |
| PLAN | 1.05 | 1.36 | 1.31 | 2.30 | 2.56 | 1.08 |
| QOMS | 1.10 | 1.39 | 1.22 | 3.52 | 3.94 | 1.38 |
| SETORS | 1.05 | 1.53 | 1.15 | 1.37 | 1.85 | 1.10 |
| Shuanghu | 1.03 | 1.10 | 1.12 | 1.90 | 1.57 | 1.33 |
| Yakou | 1.05 | 1.29 | 1.06 | 1.70 | 2.05 | 1.07 |

**Table S5.** Error metrics used in this study to evaluate the performance of various land-surface water and heat flux products.

| Metrics | Formula |
| --- | --- |
| Pearson correlation coefficient |  |
| Mean Bias Error |  |
| Normalized Mean Bias Error |  |
| Root Mean Square Error |  |
| Normalized Root Mean Square Error |  |

where n is the number of samples, denotes the eddy-covariance observation sample, denotes the simulated value from each product, and and are the regional means of the observations and simulations, respectively.
